# Supplementary material for: Impact of Infection Dose and Previous Serum Antibodies against the Locus of Enterocyte Effacement Proteins on Escherichia coli O157:H7 Shedding in Calves following Experimental Infection
Source: Biomed Res Int. 2015 Jun 8;2015:290679. doi: 10.1155/2015/290679 (PMC4475743; doi:10.1155/2015/290679)
Supplement: Supplementary file 1 — Figure 4: Histopathology of ileum, cecum and RAJ from animals of Group 1 and Group 2 stained with hematoxylin and eosin. Figure 5: Histopathological immunodetection of E. coli O157:H7 in intestine. [file 290679.f1.zip]

Archive with 3 entries (2 files):
- 290679.f1/
- 290679.f1/Fig 4 supp.ppt
- 290679.f1/Fig 5 supp.ppt
